# Supplementary material
Source: Springer Nature journal article supplement (https://www.springermedizin.de/resource/supplementary/12963_2013_232_MOESM3_ESM.pdf/9572440)
Supplement: MOESM3 [file 9572440]

**Cause of death****Approximate  
interval between  
onset and death****I**

Disease or condition directly  
leading to death\*

(a) .....

.....

due to (or as a consequence of)

***Antecedent causes***

Morbid conditions, if any,  
giving rise to the above cause,  
stating the underlying  
condition last

(b) .....

.....

due to (or as a consequence of)

(c) .....

.....

due to (or as a consequence of)

(d) .....

.....

**II**

Other significant conditions  
contributing to the death, but  
not related to the disease or  
condition causing it

.....

.....

.....

.....

*\*This does not mean the mode of dying, e.g. heart failure, respiratory failure.  
It means the disease, injury, or complication that caused death.*
